# Supplementary material
Source: PubMed Central journal article supplement (PMC3674166)
Supplement: NIHMS424746-supplement-01.pdf [file NIHMS424746-supplement-01.pdf]

Table 1. Characteristics of Participants and Nonparticipants Accumulated Over All Visits in the Beaver Dam Eye Study Population, 1988-2010.

| <i>Categorical characteristics*</i> | <b>Participants</b> |           | <b>Nonparticipants (Living)</b> |           |                | <b>Nonparticipants (Deceased)</b> |           |                |
|-------------------------------------|---------------------|-----------|---------------------------------|-----------|----------------|-----------------------------------|-----------|----------------|
|                                     | <b>%†</b>           | <b>N‡</b> | <b>%†</b>                       | <b>N‡</b> | <b>P value</b> | <b>%†</b>                         | <b>N‡</b> | <b>P value</b> |
| Age (years)                         |                     |           |                                 |           | <.001          |                                   |           | <.001          |
| 43–54                               | 19.0                | 1980      | 16.2                            | 307       |                | 2.5                               | 41        |                |
| 55–64                               | 33.1                | 3447      | 24.7                            | 468       |                | 10.4                              | 173       |                |
| 65–74                               | 30.9                | 3222      | 27.5                            | 522       |                | 25.6                              | 425       |                |
| 75–84                               | 15.0                | 1560      | 25.8                            | 489       |                | 41.2                              | 684       |                |
| ≥ 85                                | 2.1                 | 220       | 5.8                             | 109       |                | 20.3                              | 337       |                |
| < 75                                | 82.9                | 8649      | 68.4                            | 1297      | <.001          | 38.5                              | 639       | <.001          |
| ≥ 75                                | 17.1                | 1780      | 31.6                            | 598       |                | 61.5                              | 1021      |                |
| Sex                                 |                     |           |                                 |           | 0.55           |                                   |           | <.001          |
| Women                               | 57.6                | 6012      | 58.5                            | 1108      |                | 52.1                              | 865       |                |
| Men                                 | 42.4                | 4417      | 41.5                            | 787       |                | 47.9                              | 795       |                |
| Education                           |                     |           |                                 |           | <.001          |                                   |           | <.001          |
| Less than high school               | 19.3                | 2003      | 34.5                            | 648       |                | 41.2                              | 677       |                |
| High school or more                 | 80.7                | 8395      | 65.5                            | 1232      |                | 58.8                              | 968       |                |
| Annual income (USD)                 |                     |           |                                 |           | <.001          |                                   |           | <.001          |
| ≤ \$9,000                           | 8.8                 | 845       | 17.0                            | 280       |                | 20.8                              | 268       |                |
| \$10,000-\$19,000                   | 21.9                | 2105      | 27.3                            | 450       |                | 38.7                              | 498       |                |
| \$20,000-\$29,000                   | 20.3                | 1952      | 20.2                            | 333       |                | 17.7                              | 228       |                |
| \$30,000-\$44,000                   | 22.5                | 2168      | 18.9                            | 312       |                | 13.3                              | 171       |                |
| ≥ \$45,000                          | 26.5                | 2548      | 16.6                            | 274       |                | 9.5                               | 122       |                |
| Institutionalized                   |                     |           |                                 |           | <.001          |                                   |           | <.001          |
| No                                  | 99.1                | 10335     | 97.3                            | 1844      |                | 82.3                              | 1366      |                |
| Yes                                 | 0.9                 | 94        | 2.7                             | 51        |                | 17.7                              | 294       |                |
| Visual acuity, right eye            |                     |           |                                 |           | <.001          |                                   |           | <.001          |
| 20/40 and better                    | 95.9                | 9736      | 90.5                            | 1596      |                | 83.0                              | 1264      |                |
| 20/50 to 20/160                     | 2.7                 | 271       | 7.2                             | 127       |                | 10.8                              | 165       |                |
| 20/200 and worse                    | 1.4                 | 144       | 2.3                             | 40        |                | 6.1                               | 93        |                |
| Cataract status, right eye          |                     |           |                                 |           | <.001          |                                   |           | <.001          |
| Absent                              | 79.3                | 7979      | 68.6                            | 1188      |                | 47.3                              | 692       |                |
| Central cataract present            | 13.5                | 1360      | 19.9                            | 345       |                | 27.9                              | 408       |                |
| Cataract surgery                    | 7.1                 | 717       | 11.5                            | 199       |                | 24.9                              | 364       |                |
| AMD status, right eye               |                     |           |                                 |           | 0.005          |                                   |           | 0.04           |
| None                                | 86.1                | 8506      | 81.0                            | 1346      |                | 69.7                              | 920       |                |
| Early                               | 12.8                | 1267      | 16.7                            | 278       |                | 24.9                              | 329       |                |
| Late                                | 1.1                 | 109       | 2.3                             | 38        |                | 5.4                               | 71        |                |

Table 1. Characteristics of Participants and Nonparticipants Accumulated Over All Visits in the Beaver Dam Eye Study Population, 1988-2010. (cont.)

|                                                                                                                                                  | Participants |        |      |      | Nonparticipants (Living) |        |      |      | P     | Nonparticipants (Deceased) |        |      |      | P     |
|--------------------------------------------------------------------------------------------------------------------------------------------------|--------------|--------|------|------|--------------------------|--------|------|------|-------|----------------------------|--------|------|------|-------|
|                                                                                                                                                  | N‡           | Median | Mean | SD   | N‡                       | Median | Mean | SD   |       | N‡                         | Median | Mean | SD   |       |
| <i>Continuous characteristics*</i>                                                                                                               |              |        |      |      |                          |        |      |      |       |                            |        |      |      |       |
| Age (years)                                                                                                                                      | 10429        | 64.0   | 64.2 | 10.2 | 1895                     | 68.0   | 67.3 | 11.5 | <.001 | 1660                       | 77.0   | 76.2 | 9.8  | <.001 |
| Education (years)                                                                                                                                | 10399        | 12.0   | 12.6 | 2.8  | 1881                     | 12.0   | 11.6 | 2.7  | <.001 | 1645                       | 12.0   | 11.3 | 3.0  | <.001 |
| Number of letters, right eye                                                                                                                     | 10151        | 55.0   | 52.5 | 13.3 | 1763                     | 53.0   | 49.1 | 15.9 | <.001 | 1522                       | 48.0   | 42.9 | 21.8 | <.001 |
| Body mass index (kg/m <sup>2</sup> )                                                                                                             | 10240        | 29.0   | 29.6 | 5.7  | 1801                     | 28.5   | 29.3 | 5.7  | 0.14  | 1536                       | 27.9   | 28.4 | 5.9  | <.001 |
| AMD, age-related macular degeneration; SD, standard deviation; USD, United States dollars.                                                       |              |        |      |      |                          |        |      |      |       |                            |        |      |      |       |
| * Characteristic measured at one exam, participation at next exam.                                                                               |              |        |      |      |                          |        |      |      |       |                            |        |      |      |       |
| † Percentages do not always total 100% due to rounding.                                                                                          |              |        |      |      |                          |        |      |      |       |                            |        |      |      |       |
| ‡ Number of person-visits (each visit accumulated across all 5 examination phases for each person). See Methods section for further description. |              |        |      |      |                          |        |      |      |       |                            |        |      |      |       |
