# Supplementary material
Source: PubMed Central journal article supplement (PMC3674166)
Supplement: NIHMS424746-supplement-02.pdf [file NIHMS424746-supplement-02.pdf]

Table 3. Cumulative Incidence of Visual Impairment by Age and Duration of Follow-up in the Beaver Dam Eye Study.

| <b>Starting Age (years)</b> | <b>Duration of Follow-up (years)</b> |           |           |           |
|-----------------------------|--------------------------------------|-----------|-----------|-----------|
|                             | <b>5</b>                             | <b>10</b> | <b>15</b> | <b>20</b> |
| 45                          | 0.0                                  | 0.0       | 0.1       | 0.2       |
| 50                          | 0.0                                  | 0.1       | 0.2       | 0.6       |
| 55                          | 0.1                                  | 0.2       | 0.5       | 1.3       |
| 60                          | 0.1                                  | 0.5       | 1.2       | 3.0       |
| 65                          | 0.3                                  | 1.1       | 2.8       | 6.8       |
| 70                          | 0.8                                  | 2.5       | 6.5       | 14.8      |
| 75                          | 1.8                                  | 5.7       | 14.2      | 30.3      |
| 80                          | 4.0                                  | 12.6      | 29.0      | 53.9      |
| 85                          | 9.0                                  | 26.0      | 51.9      | 78.7      |
| 90                          | 18.7                                 | 47.2      | 76.6      | *         |

\* Cannot estimate.
