# Supplementary material
Source: PubMed Central journal article supplement (PMC3674166)

Figure 3. Relationships of age with incident visual impairment by selected covariates in the Beaver Dam Eye Study, 1988-2010.

**A. Sex**

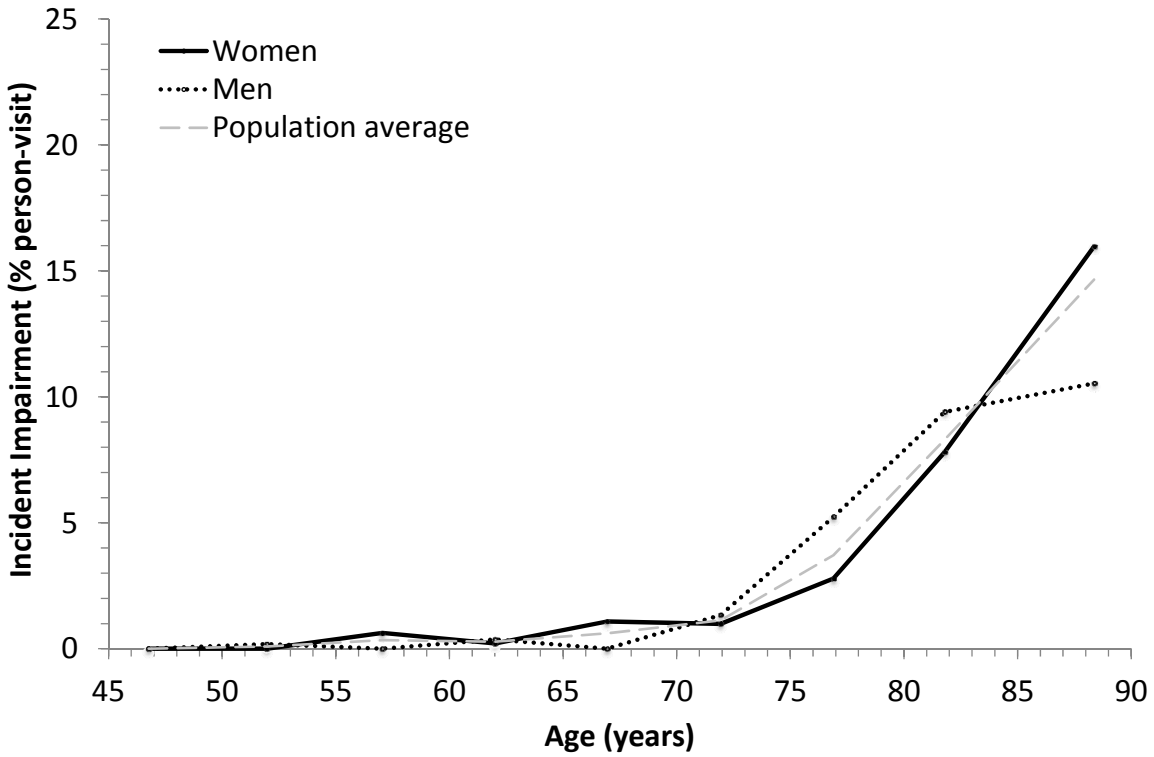

**B. Education level**

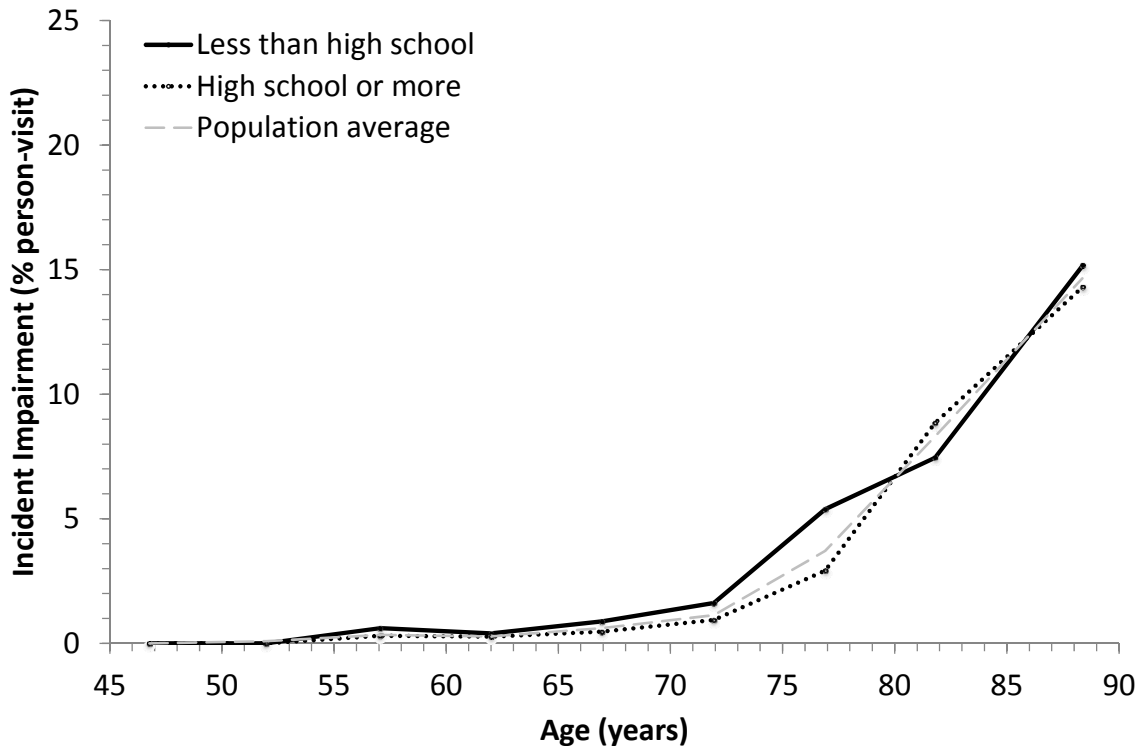

Figure 3. Relationships of age with incident visual impairment by selected covariates in the Beaver Dam Eye Study, 1988-2010. (continued)

**C. Annual income (in United States dollars)**

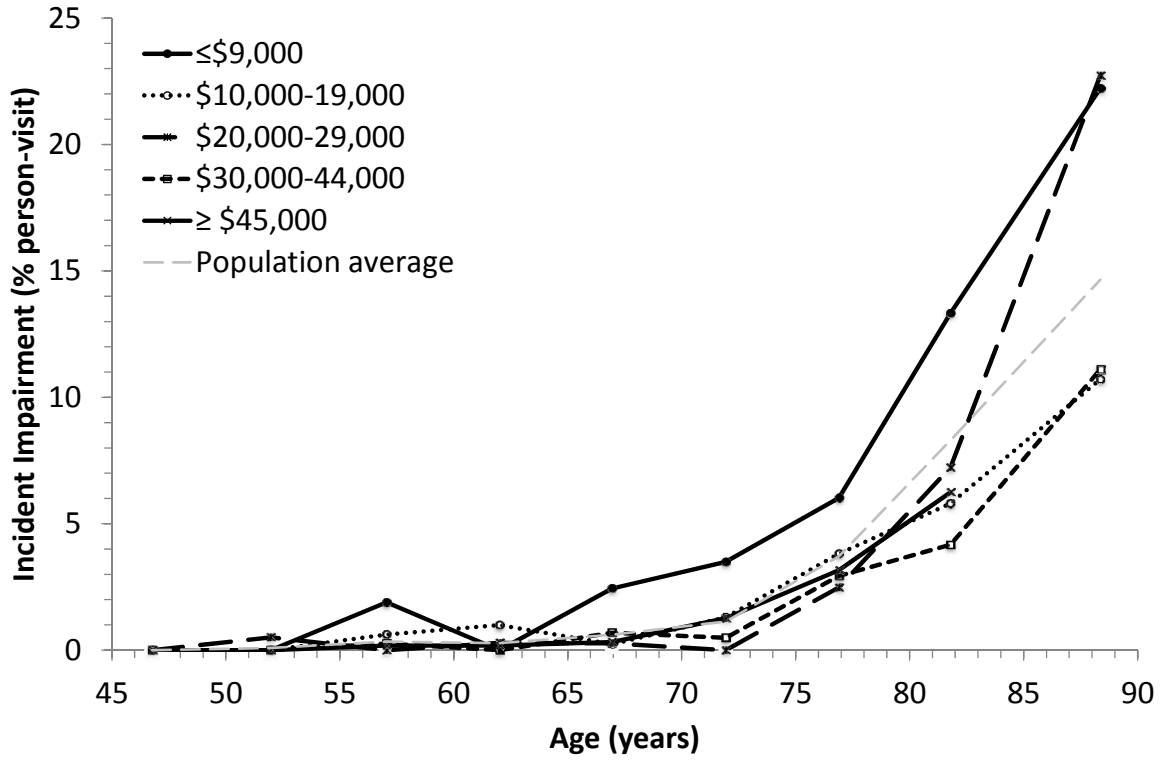

**D. Central cataract status**

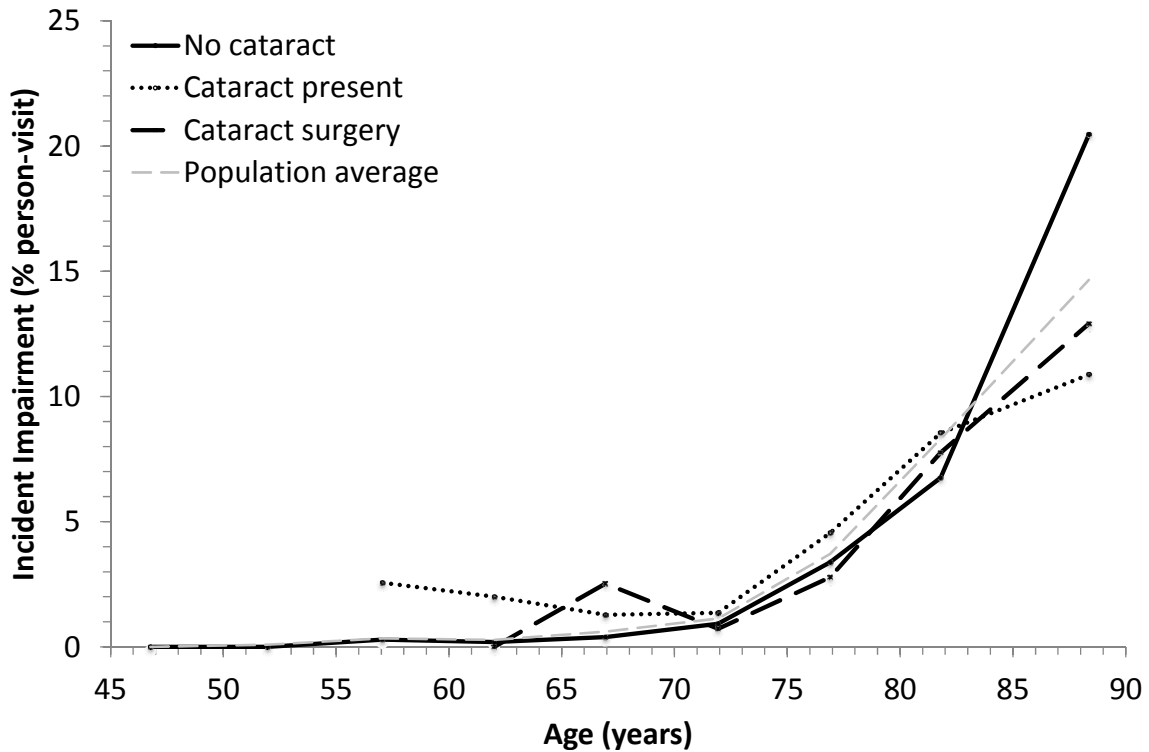

Figure 3. Relationships of age with incident visual impairment by selected covariates in the Beaver Dam Eye Study, 1988-2010. (continued)

**E. Age-related macular degeneration (AMD) status**

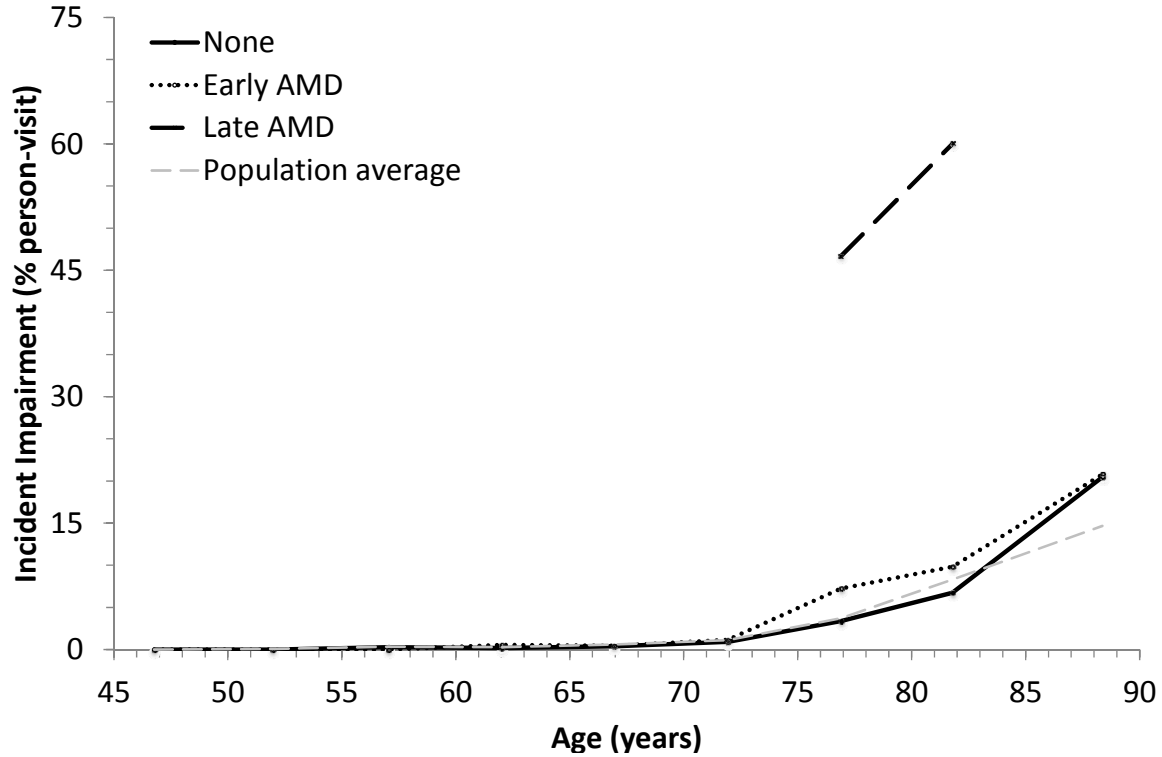

**F. Institutionalization status**

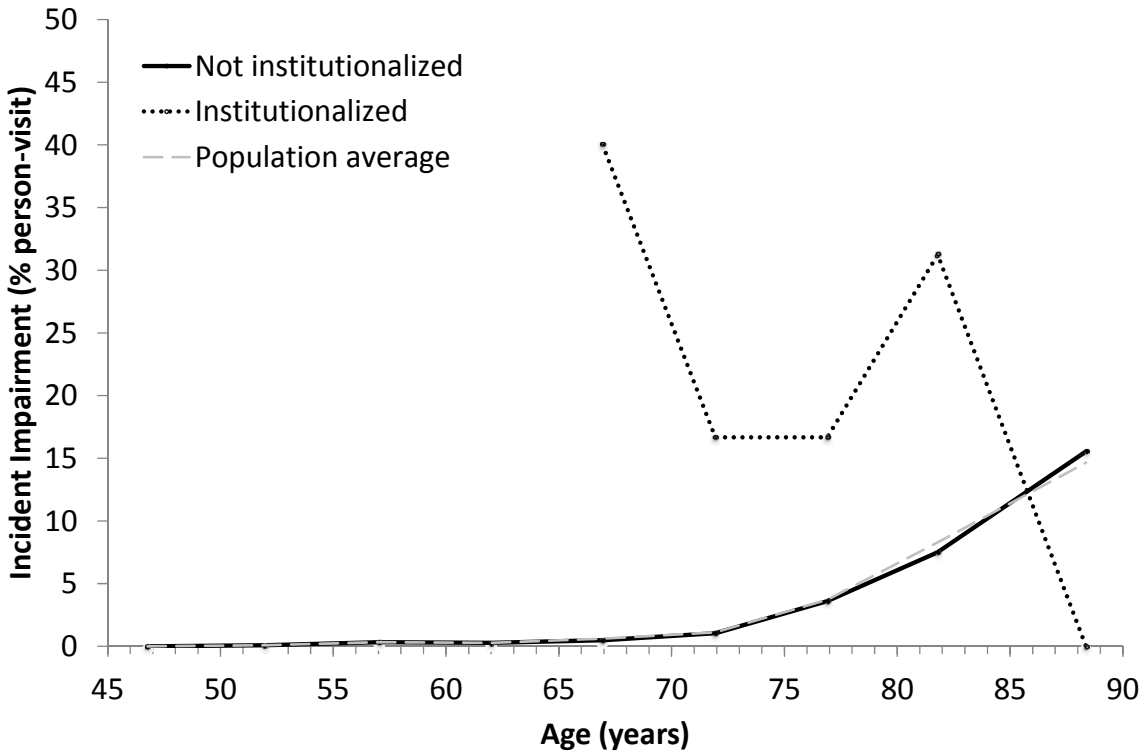

Supplement: NIHMS424746-supplement-03.pdf [file NIHMS424746-supplement-03.pdf]
